1 **Title: Phylogeny, ancestors and anagenesis in the hominin fossil record**

2 **Authors:** Caroline Parins-Fukuchi<sup>1\*</sup>, Elliot Greiner<sup>2</sup>, Laura M. MacLatchy<sup>2,3</sup>, Daniel C.  
3 Fisher<sup>4,3,1</sup>

4 **Affiliations:**

5 <sup>1</sup>Department of Ecology and Evolutionary Biology, University of Michigan, Ann Arbor,  
6 Michigan, USA

7 <sup>2</sup>Department of Anthropology, University of Michigan, Ann Arbor, Michigan, USA

8 <sup>3</sup>Museum of Paleontology, University of Michigan, Ann Arbor, Michigan, USA

9 <sup>4</sup>Department of Earth and Environmental Sciences, University of Michigan, Ann Arbor,  
10 Michigan, USA

11 \*Correspondence to: [cfukuchi@umich.edu](mailto:cfukuchi@umich.edu)

12

13 **Acknowledgments:** CPF would like to thank JW Brown, CW Dick, M Friedman, SA Smith, and  
14 GW Stull for helpful discussion of the manuscript and method.

15

16 **Author contributions:** CPF designed and implemented the ML stratocladistic procedure,  
17 performed analyses, interpreted results, and drafted the manuscript. DCF made conceptual  
18 contributions to the stratocladistic approach developed here, contributed to the manuscript, and  
19 helped interpret results. EG gathered temporal occurrence ranges, helped interpret results, and  
20 edited the manuscript. LMM helped focus the scope of the hominin analysis, helped interpret  
21 results, and contributed to the manuscript.

22

23 **Supplementary data:** Software used in this study is implemented in the *mandos* package and is  
24 available on GitHub ([github.com/carolinetomo/mandos](https://github.com/carolinetomo/mandos)). All trees tested using the stratocladistic  
25 likelihood procedure and their associated AIC scores are available on GitHub (WEB  
26 ADDRESS—will upload prior to submission). This repository also contains the morphological

27 matrix and stratigraphic range files and all scripts needed to reproduce results. Stratigraphic  
28 occurrences and their associated citations are provided as supplementary information. The  
29 supplement also includes an online appendix that describes and tests the morphological  
30 likelihood calculation on trees containing anagenetic relationships.

31

32

33

34

35

36

37

38

39

40

41

42

43

44

45

46

47

48

49 **Abstract:** Probabilistic approaches to phylogenetic inference have recently gained traction in  
50 paleontological studies. Because they directly model processes of evolutionary change,  
51 probabilistic methods facilitate a deeper assessment of variability in evolutionary pattern by  
52 weighing evidence for competing models. Although phylogenetic methods used in  
53 paleontological studies have generally assumed that evolution proceeds by splitting cladogenesis,  
54 extensions to previous models help explore the potential for morphological and temporal data to  
55 provide differential support for contrasting modes of evolutionary divergence. Recent  
56 methodological developments have integrated ancestral relationships into probabilistic  
57 phylogenetic methods. These new approaches rely on parameter-rich models and sophisticated  
58 inferential methods, potentially obscuring the respective contributions of data and models. In this  
59 study, we describe a simple likelihoodist approach that combines probabilistic models of  
60 morphological evolution and fossil preservation to reconstruct both cladogenetic and anagenetic  
61 relationships. By applying this approach to a dataset of fossil hominins, we demonstrate the  
62 capability of existing models to unveil evidence for anagenesis presented by morphological and  
63 temporal data. This evidence was previously recognized by qualitative assessments, but largely  
64 ignored by quantitative phylogenetic analyses. For example, we find support for directly  
65 ancestral relationships in multiple lineages: *Sahelanthropus* is ancestral to later hominins;  
66 *Australopithecus anamensis* is ancestral to *Au. afarensis*; *Au. garhi* is ancestral to *Homo*; *H.*  
67 *antecessor* is ancestral to *H. heidelbergensis*, which in turn is ancestral to both *H. sapiens* and *H.*  
68 *neanderthalensis*. These results show a benefit of accommodating direct ancestry in  
69 phylogenetics. By so doing, quantitative results align more closely with previous qualitative  
70 expectations.

71 **Keywords:** anagenesis, phylogenetics, morphology, paleontology, hominin

72 **Introduction:** Phylogenetic methods that rely upon probabilistic evolutionary models have  
73 recently begun to emerge as important tools for addressing paleobiological issues at  
74 macroevolutionary timescales (Wright and Hillis 2014; Puttick et al. 2017). Probabilistic  
75 approaches appear promising in their performance relative to earlier cladistic methods and offer  
76 several important advantages. These include their tendency to increase the clarity with which  
77 models are specified and their ability to weigh evidence under competing evolutionary models  
78 using modern inferential machinery. While probabilistic approaches have long been dominant in  
79 molecular phylogenetics, their application to paleontological datasets is largely untapped. Yet  
80 the extension of approaches developed for extant taxa to fossil taxa will allow for the testing of a  
81 broader range of evolutionary hypotheses that are designed to reflect differences in the  
82 morphological patterns underlying divergence between fossil taxa.

83 Most previous approaches to phylogenetic reconstruction depict evolutionary relatedness  
84 using patterns of ‘hypothetical’ ancestry in which more closely related taxa are represented as  
85 possessing more recent common (hypothetical) ancestors. However, when fossil taxa are  
86 included in phylogenetic analyses, we might reasonably consider whether direct ancestry  
87 between temporally disjunct taxa or samples can be detected (Foote 1996). Although there is a  
88 spectrum of possible patterns of temporal distribution reflecting directly ancestral relationships,  
89 these may be dichotomized into cladogenesis and anagenesis.

90 Characterization of the relative prevalence of cladogenesis and anagenesis in the fossil  
91 record and their bearing on the study of evolutionary mode has long been a fundamental question  
92 in paleobiology (Simpson 1944; Stanley 1998; Levinton 2001). Although the significance of  
93 these contrasting models of evolutionary change in interpreting patterns in the fossil record has  
94 been fiercely debated (Gould and Eldredge 1977; Gould 1980; Levinton and Chris 1980;

95 Gingerich 1985; Futuyma 1987), anagenetic change has been widely observed in the fossil  
96 record and can impact inferences of evolutionary processes (MacLeod 1991). This may be  
97 particularly important when constructing and testing hypotheses of phylogenetic relationships,  
98 where accommodation of anagenetic change may improve accuracy and yield insights otherwise  
99 unattainable (Gingerich 1979; Fox et al. 1999; Aze et al. 2011; Strotz and Allen 2013; Aze et al.  
100 2013).

101 Quantitative phylogenetic approaches have usually assumed the universality of  
102 cladogenesis. Until recently, this fundamental limitation has remained largely intact, despite the  
103 development of increasingly sophisticated probabilistic approaches to phylogenetic inference.  
104 Since most of the major developments in probabilistic approaches to phylogenetics were  
105 developed for molecular data (but see Lewis 2001), their use has been largely restricted to  
106 neontological applications. As a result, there has been relatively little impetus in the areas most  
107 engaged in phylogenetic research to consider phyletic evolution, leaving the role of anagenesis in  
108 phylogenetic reconstruction under-explored.

109 The conceptual issues discussed above are particularly relevant in taxa such as the  
110 hominin clade (humans and all other taxa more closely related to humans than to genus *Pan*),  
111 where hypotheses of direct ancestry are often proposed. Discerning human evolutionary patterns  
112 is a focus traceable to Darwin (1871), and ancestry is almost certainly more frequently proposed  
113 (even if informally) for clusters hominin fossils than for those from other taxonomic groups.  
114 Nonetheless, there are few formal routes for recognizing this status based on quantitative  
115 evaluations of traits.

116 Although quantitative approaches to phylogenetics have typically ignored anagenesis,  
117 stratocladistic methods were developed to leverage temporal occurrence data to help reconstruct

118 phylogenetic trees that have the potential to express direct ancestor-descendant relationships  
119 (Fisher 2008). Stratocladistics uses the criterion of maximum parsimony (MP) to minimize both  
120 the number of homoplasious character changes and unsampled stratigraphic intervals implied by  
121 topologies that include both bifurcating and serially linked segments of phyletic lineages. Several  
122 authors have expressed objections both to the use of temporal data in phylogenetic inference and  
123 the capability of available data to adequately test ancestral and collateral relationships between  
124 species (Smith 2000). Nevertheless, direct ancestors are expected to occur in the fossil record  
125 (Foote 1996), and the integration of temporal data has been shown to improve reconstruction  
126 accuracy over morphological analyses alone (Fox et al. 1999). In addition, those earlier  
127 criticisms, which have been frequently raised by proponents of cladistic methodologies, are also  
128 less relevant when placed in the context of the modern probabilistic approaches. While cladistics  
129 operates at the level of cladograms, both stratocladistics and recent probabilistic approaches  
130 reconstruct phylogenetic trees. This renders earlier criticism of temporal data largely irrelevant  
131 given the current landscape of phylogenetic methodology. As such, it stands to reason that  
132 probabilistic approaches are remiss when they fail to accommodate the possibility of ancestor-  
133 descendant relationships between temporally heterogeneous taxa.

134         There have been several attempts to explicitly extend the intent and logic of  
135 stratocladistics into probabilistic approaches using maximum-likelihood (ML) (Huelsenbeck and  
136 Rannala 1997; Wagner 1998). However, these have not found widespread use. Aspects of these  
137 have been appropriated more recently by methods that use some combination of morphological,  
138 fossil preservation, and lineage diversification models to infer relationships and lineage  
139 divergence times in a Bayesian context (Pyron 2011). This framework has been extended to  
140 explicitly accommodate ancestor-descendant relationships by modelling lineage diversification

141 and fossil preservation processes (Stadler 2010; Bapst and Hopkins 2016; Stadler et al. 2017), in  
142 particular through the use of the ‘Fossilized Birth-Death’ (FBD) prior (Heath et al. 2014; Zhang  
143 et al. 2016). However, the assumptions and ramifications of doing so have not been well  
144 explored.

145         One outstanding question regarding these approaches is the extent to which  
146 morphological data themselves are able to illuminate questions of direct ancestor-descendant  
147 relationships without explicitly modelling the process of lineage diversification. This may be  
148 especially important in clades with gappy fossil records, such as many lineages of terrestrial  
149 vertebrates. In these cases, there may be less information available to reconstruct speciation and  
150 extinction parameters, and so a characterization of the identifiability of hypotheses of direct  
151 ancestry from morphology alone can benefit future studies in these taxa. In addition,  
152 methodological extensions of Bayesian tip-dating methods that accommodate serial sampling of  
153 lineages have been largely developed for use in epidemiological systems, where they are used to  
154 model molecular sequence evolution along single lineages. Although these systems are useful  
155 models of patterns in the fossil record, their sampling is often incomplete, and so they may  
156 sometimes call for different approaches in practice. Non-Bayesian *a posteriori* time-scaling  
157 (APT) approaches, such as *cal3*, that accommodate ancestor-descendant relationships also exist  
158 (Bapst 2013). These apply divergence times to unscaled cladograms that have been inferred from  
159 character data alone. Although both Bayesian and APT approaches have been shown effective  
160 when applied to fossil taxa (Bapst 2013; Bapst and Hopkins 2016; Gavryushkina et al. 2017;  
161 Stadler et al. 2017), there has been limited discussion of the statistical properties, limitations, and  
162 implications of using existing paleontological data and probabilistic models to identify  
163 anagenesis. Nevertheless, anagenesis is an evolutionary question of critical importance, and so

164 the development of a probabilistic approach using likelihoodist criteria may be broadly beneficial  
165 by clearly quantifying the evidence for anagenesis present in paleontological data.

166 Although cladistic methods have been applied to improve understanding of certain  
167 aspects of hominin evolution (Delson et al. 1977; Chamberlain and Wood 1987; Strait et al.  
168 1997; Irish et al. 2013), their exclusive focus on bifurcating relationships has precluded the study  
169 of direct ancestry except in cases where character polarity and specimen sampling have been  
170 carefully considered (Kimbel et al. 2006). More recently, Bayesian approaches have been  
171 suggested to provide a clearer view of hominin evolutionary relationships (Dembo et al. 2015;  
172 2016), but their results still contain ambiguities. For example, like earlier cladistic approaches  
173 (Strait et al. 1997; Strait 1999), results from Bayesian analyses conflict with qualitative  
174 interpretations of hominin relationships in several key instances. This divide is exemplified by  
175 considering the taxa *Homo heidelbergensis* and *Homo antecessor*, for whom hypotheses of  
176 anagenesis are often considered. For example, previous studies have alternatively suggested that  
177 either *Homo heidelbergensis* or *Homo antecessor* may be directly ancestral to *Homo sapiens* and  
178 *Homo neanderthalensis* (Mounier et al. 2009), while some have debated the suggestion that  
179 *Homo antecessor* is ancestral to *Homo heidelbergensis* (Stringer 2012). Others have suggested  
180 alternately that *Homo heidelbergensis* is either a chronospecies directly ancestral to *H.*  
181 *neanderthalensis*, or directly ancestral to both *H. sapiens* and *H. neanderthalensis* (Rightmire  
182 1998; Rosas and Bermúdez De Castro 1998; Stringer 2012). This uncertainty is underscored by  
183 the suggestion that cladistic methods and data are unreliable in their ability to describe hominin  
184 evolutionary patterns and history (Collard and Wood 2000).

185 In this study, we describe an approach to phylogenetic inference that combines models of  
186 stratigraphic preservation and morphological evolution to reconstruct time-scaled phylogenies



187 and distinguish between anagenesis and cladogenesis using ML and the Akaike Information  
188 criterion (AIC). This approach seeks to simplify existing methods, such as the APT and FBD  
189 approaches described above, to clearly identify the signal for directly ancestral relationships  
190 presented by morphological data alone. Unlike more complex approaches, ours seeks only to  
191 identify information in morphological and temporal data that establishes differential support for  
192 ancestor-descendant and bifurcating relationships. As a result, our approach explicitly relies on  
193 models of morphological evolution and stratigraphic preservation rather than on models of  
194 lineage diversification.

195         We apply our new approach in hominins using a morphological supermatrix borrowed  
196 from the literature (Dembo et al. 2015; 2016). Hominins are a particularly compelling case study  
197 for our questions surrounding the identifiability of phylogenetic models that incorporate  
198 anagenesis. Although cladistic and phylogenetic methods have been applied to hominins  
199 (Chamberlain and Wood 1987; Strait et al. 1997; Strait 1999; Irish et al. 2013; Dembo et al.  
200 2015; 2016), previous methods' exclusive focus on bifurcating relationships has led to their  
201 inability to fully address outstanding hypotheses of hominin evolution, which are often  
202 predicated upon the occurrence of anagenesis. Our analysis identified several areas of anagenetic  
203 change in hominins, demonstrating cases where temporal data both corroborate and refute results  
204 achieved using morphology alone. We recognize that increasingly thorough compilation of  
205 morphological data and new fossil discoveries is likely to continue to revise and refine current  
206 understanding of hominin evolution. Nevertheless, our approach sheds light on the capabilities of  
207 existing models and data to accommodate anagenetic change without becoming entangled in a  
208 complex web of Bayesian assumptions. Moving forward, application of our method in hominins  
209 provides general demonstration of the importance of accommodating anagenetic change in

210 phylogenetic methods to generate deeper understanding of evolutionary patterns in the fossil  
211 record.

212

213 **Materials and methods:**

214 *Inference of ML topology.* Our approach evaluates the likelihood of candidate topologies using  
215 probabilistic models of fossil preservation and morphological evolution (Huelsenbeck and  
216 Rannala 1997; Lewis 2001). We perform a semi-automated tree search by calculating the  
217 likelihoods of these models on a set of candidate topologies. This approach tests hypotheses of  
218 direct ancestorship by combining branches with non-overlapping ranges and comparing  
219 cladogenetic and anagenetic models using the AIC. All code developed for these analyses is  
220 publicly available and implemented in the *mandos* package  
221 ([www.github.com/carolinetomo/mandos](http://www.github.com/carolinetomo/mandos)).

222 *Identification of a fully-bifurcating ML tree.* Our approach has yet to be implemented with a fully  
223 automated tree searching algorithm, so we combine semi-automated rearrangements with manual  
224 perturbations to search for the ML topology. This is done by exploring tree-space surrounding a  
225 starting tree estimated from morphological characters alone. In this study, we obtained a ML  
226 starting tree using RAxML, version 8.2.11, using the Mk model of morphological evolution  
227 (Lewis 2001). The morphological data were separated into partitions according to the number of  
228 possible states (i.e., binary, trinary, etc.) and analyzed under separate models. This partitioning  
229 scheme was maintained for all subsequent morphological likelihood calculations, including those  
230 used below in the AIC comparisons. We then performed a series of nearest neighbor interchange  
231 (NNI) and subtree pruning and regrafting (SPR) operations. These yielded a set of 1700  
232 candidate topologies from which we identified the fully-bifurcating topology best supported by

233 both morphologic and stratigraphic data. This tree provided a starting point drawn from both  
234 morphologic and stratigraphic lines of evidence. From here, we explored ancestor-descendant  
235 relationships using the model-testing approach described below.

236 *Modelling stratigraphic preservation.* Stratigraphic likelihoods were calculated under a  
237 homogeneous Poisson process of geologic preservation. When applied to phylogenetics,  
238 inference under this model has been shown to accurately recover simulated phylogenetic  
239 relationships (Huelsenbeck and Rannala 1997). The likelihood function is derived from a  
240 Poisson process as the probability of observing the first occurrence ( $o_f$ ), last occurrence ( $o_l$ ) and  
241 number ( $n_o$ ) of occurrences in the stratigraphic record given some origination and extinction time  
242 ( $t_f$  and  $t_l$ , respectively) and preservation rate ( $\lambda$ ). These likelihoods are calculated independently  
243 for each ( $i$ ) of  $b$  total lineages and multiplied to yield the overall tree likelihood (see  
244 (Huelsenbeck and Rannala 1997) for full derivation):

$$245 \quad \hat{L} = \prod_{i=1}^b \frac{(o_f^i - o_l^i)^{n_o^i - 2} \lambda^{n_o^i} e^{-\lambda(t_f^i - t_l^i)}}{(n_o^i - 2)!}$$

(Eq. 1)

246 This equation reaches its maximum as branching and extinction times approach the first and last  
247 occurrences in the fossil record, and so the likelihood is maximized across the tree when the total  
248 amount of unsampled time implied by the topology is minimized. Although this approach differs  
249 from stratocladistic parsimony in its treatment of occurrence data as continuous rather than  
250 discrete, this property causes the preservation model to behave as a statistical formalization of  
251 the stratigraphic parsimony debt calculations undertaken in parsimony-based stratocladistic  
252 analyses. We estimate lineage origination and termination times along with preservation rate  
253 using multivariate numerical optimization routines implemented in SciPy (Jones et al. n.d.).

254 When combined with morphological data and models of character evolution, this approach  
255 represents a comprehensive extension of traditional stratocladistics based entirely upon  
256 probabilistic models.

257 *Identification of anagenesis.* Using the bifurcating topology with the highest likelihood under  
258 both stratigraphic and morphologic models, we manually identified a set of potential ancestor-  
259 descendant relationships. To explore a more comprehensive range of both anagenetic and  
260 cladogenetic arrangements, we also extensively perturbed results manually and compared  
261 likelihoods. Although a fully-automated tree searching approach will ultimately be desirable in  
262 future versions of our method, our approach to tree-searching is similar to those used in previous  
263 stratocladistic studies. Starting with the fully bifurcating tree, we identified putative ancestor-  
264 descendant arrangements by collapsing each branch with a temporal range beginning earlier than  
265 the range represented by its sister lineage. We isolated each putative episode of anagenesis and  
266 compared the morphologic and stratigraphic likelihoods of anagenetic and cladogenetic  
267 arrangements using AIC scores. This was required because cladogenetic nodes assume one more  
268 parameter than anagenetic nodes (i.e., the branch length of the new lineage), and so bifurcating  
269 trees contain more parameters than anagenetic trees. Comparison of AIC scores enables a  
270 comparison of the relative quality of models with different numbers of parameters. AIC score is  
271 calculated from the number of model parameters ( $k$ ), and the log-likelihood ( $L$ ):

$$272 \quad AIC = 2k - 2 \ln L$$

(Eq. 2)

273 Since models with larger numbers of parameters are more prone to overfitting, they are biased  
274 toward possessing higher likelihoods than less complex models. As a result, likelihood scores of

275 models that differ in dimension are not directly comparable. AIC scores represent the amount of  
276 information lost by a model when representing data, with lower scores indicative of models that  
277 preserve a greater amount of information. AIC accommodates for differences in parameter count  
278 between models by penalizing the addition of additional parameters, seeking to optimize the  
279 trade-off between improvements in model fit associated with added parameters and the loss of  
280 statistical power that results from overparameterization. In our use, AIC facilitates comparison of  
281 phylogenetic models of differing dimensions by penalizing the addition of branches that are  
282 better explained through an anagenetic pattern. The parameter count,  $k$ , for each phylogeny is  
283 calculated by summing the number of estimated branch lengths for each tree with the number of  
284 parameters used in the partitioned Mk substitution model.

285 Under the Poisson preservation model, stratigraphic likelihood predictably improves  
286 when unsampled time implied by the phylogeny is reduced, and so the acceptance of anagenetic  
287 arrangements also requires the support of morphology. This requires a novel calculation of  
288 morphological likelihood where the probability of transitioning from an observed, rather than an  
289 uncertain, parental character state to a single or multiple descendant character states is calculated  
290 under the Mk model (Fig. 1). This calculation differs from that used on multi-furcating nodes.  
291 Since the sequences at internal nodes representing unobserved taxa are unknown, the likelihood  
292 of character data at the tips is typically calculated by summing over all possible states at each  
293 unobserved internal node (Felsenstein 1981). However, when dealing with anagenesis, the sets of  
294 character states at some internal nodes are known. In these cases, the likelihood is calculated as  
295 the conditional probability of observing the set of traits at the tips given the set of traits  
296 possessed by the putative ancestor. Anagenetic arrangements are only accepted when there has  
297 been a sufficiently small amount of character change. This procedure resembles model testing

298 procedures used to reconstruct ancestral DNA sequences, which compare conditional likelihoods  
299 of different permutations of character states at ancestral nodes (Yang et al. 1995). Like  
300 stratocladistics, this use of probabilistic models of character change enables morphology to  
301 occupy a central role in identifying anagenesis. As a result, this approach can in principle be used  
302 to test anagenesis even in the absence of a temporal model. A demonstration and test of this  
303 method using simulated data is provided in the supplement.

304 *Morphological matrix.* We performed our analysis on a supermatrix of 391 discrete craniodental  
305 characters compiled by Dembo and colleagues (Dembo et al. 2015; 2016). We removed all  
306 ambiguous character states, as researchers did not identify whether these were truly ambiguous  
307 or polymorphic. While ambiguous character codings are unlikely to provide significant  
308 phylogenetic information, existing Markov models of discrete character evolution do not  
309 accommodate polymorphism. We excluded the taxa *Kenyanthropus platyops* and *Homo naledi*  
310 from the present analysis. The features that are diagnostic of *K. platyops* have been suggested to  
311 result from taphonomic distortion resulting from matrix expansion, rather than from true  
312 biological differences (White 2003). Thus, we omitted this taxon in hopes of shedding greater  
313 light on the remaining, more widely accepted hominin taxa. *Homo naledi* was omitted because  
314 the data provided in the original study yielded an ML topology placing *H. naledi* as sister to *H.*  
315 *sapiens*. Although the phylogenetic affinity of *H. naledi* is a major outstanding question in  
316 paleoanthropology, the confusing signal presented by the *H. naledi* data, which are relatively  
317 recently acquired and therefore represent less well-studied fossils overall, reduced our  
318 confidence in the ability of this dataset to resolve its placement. Therefore, to avoid any  
319 confounding effects from the potential unreliability of the *H. naledi* data, we performed our

320 analyses on the remaining subset of the data after *H. naledi* was removed. This enabled us to  
321 explore the phylogenetic relationships between better-known hominins.

322 *Geologic occurrence times.* We surveyed the literature to obtain the observed temporal range of  
323 each taxon in continuous time. Reported radiometric dates for the oldest and youngest fossils  
324 were taken as the first and last observations. Some specimens are ambiguous in their taxonomic  
325 assignment; these were excluded from the analysis. We also gathered the number of total  
326 occurrences as the number of localities where each taxon has been identified as listed in  
327 MacLachy et al. (2010), and supplemented these with additional localities identified in the  
328 literature. Cases where multiple specimens belonging to the same taxon have been identified at a  
329 single locality were treated as single occurrences. Although we recognize the potential ambiguity  
330 in delineating between sites, localities, and occurrences, we attempted to coarsely characterize  
331 the total number of occurrences using the number of sites at which each taxon occurs. This  
332 approach is more likely to underestimate the number of occurrences than overestimate them,  
333 which we expect to yield more conservative statistical support for competing topologies under  
334 the preservation model. A comprehensive list of the sites used to define temporal ranges for all  
335 taxa is provided in the supplement.

336

### 337 **Results and Discussion:**

338 *Anagenesis in the hominin fossil record:* Our analysis yielded evidence for several instances of  
339 anagenesis in the hominin fossil record (Fig. 2). Our analysis reconstructed *Australopithecus*  
340 *anamensis* as directly ancestral to *Au. afarensis*. This result agrees with broad acceptance of *Au.*  
341 *anamensis* and *Au. afarensis* as phyletically linked chronospecies (Leakey et al. 1995; Ward et  
342 al. 2001; Kimbel et al. 2006). Although our analysis recovered *Ar. ramidus* as sister to the

343 anagenetic *Au. anamesis*-*Au. afarensis* branch, the morphological data did not support the  
344 collapse of *Ar. ramidus*. Nevertheless, *Ar. ramidus* possessed poor character sampling in the  
345 matrix, and so its placement should be regarded as tentative. *Sahelanthropus tchadensis* is  
346 recovered as a direct ancestor to the rest of the hominin clade. This result should also be treated  
347 cautiously due to the small number of characters recovered for analysis of this portion of the  
348 phylogeny, but it is in line with with *Sahelanthropus*' status as the oldest recognized hominin  
349 (Brunet et al. 2002; Guy et al. 2005; Zollikofer et al. 2005).

350 Consistent with an early appraisal (Asfaw et al. 1999), our final analysis inferred *Au.*  
351 *garhi* to be directly ancestral to the *Homo* clade (Fig.2a). This conflicts with cladistic analyses  
352 that placed *Au. garhi* as outgroup to *Au. africanus*, *Paranthropus*, and *Homo* (Strait 1999).  
353 However, when anagenesis is not considered and phylogeny is inferred from morphology alone,  
354 we recover the same placement for *Au. garhi* as the cladistic result (Fig. 2b). Like the example  
355 above, this may reflect the constraint that strictly bifurcating methods impose on phylogenetic  
356 reconstructions among fossil taxa. However, preference for *Au. garhi* as ancestral to *Homo* is  
357 weak, with an only slightly improved AIC score over the *Au. garhi* outgroup hypothesis (Table  
358 1).

359 Our results also better reconcile quantitative and qualitative interpretations of the  
360 evolutionary mode and relationships among the *Homo* species leading to modern humans and  
361 Neanderthals. Paleoanthropologists have variously interpreted *Homo heidelbergensis* as either:  
362 1) a direct ancestor to both Neanderthals and modern humans (Rightmire 1998; Mounier et al.  
363 2009; Stringer 2012; Buck and Stringer 2014), or 2) a chronospecies leading to Neanderthals  
364 (Rosas and Bermúdez De Castro 1998). However, quantitative phylogenetic analysis has placed  
365 *H. heidelbergensis* as sister to Neanderthals (Dembo et al. 2015). Our ML result based on



366 morphological characters alone places *H. heidelbergensis* as sister to *H. sapiens*. However, when  
367 temporal data are incorporated and anagenesis is accommodated, AIC support improves  
368 substantially, and *H. heidelbergensis* is collapsed to represent a direct ancestor of modern  
369 humans and Neanderthals (Fig. 3). We also uncover one other instance of anagenesis in this  
370 clade. Opinions are divided as to whether *H. antecessor* represents a direct ancestor of later  
371 hominin species or is an evolutionary dead end (Bermúdez de Castro et al. 1997; Stringer 2012;  
372 Dembo et al. 2015), but our results provide support for combining *H. antecessor* and *H.*  
373 *heidelbergensis* into a single lineage. This suggests a long episode of anagenetic evolution  
374 immediately prior to the divergence between modern humans and Neanderthals.

375 Overall, our reconstruction of relationships among later species of *Homo* immediately  
376 preceding and encompassing modern humans and Neanderthals supports the hypothesis that *H.*  
377 *heidelbergensis* is directly ancestral to both modern humans and Neanderthals. This result  
378 differs from the hypothesis supported by the analysis performed by Dembo and colleagues  
379 (Dembo et al. 2015), and is instead more consistent with an earlier exploratory statistical analysis  
380 (Mounier et al. 2009), and with the position frequently suggested by paleoanthropologists  
381 (Rightmire 1998; Stringer 2012; Buck and Stringer 2014). While previous phylogenetic analyses  
382 have yielded results that equivocate or disagree with the common interpretation of *H.*  
383 *heidelbergensis* as the last common ancestor of modern humans and Neanderthals, our analysis  
384 shows that the consideration of direct ancestry can generate statistical support for phylogenetic  
385 results that conform more closely to positions generated through researchers' subjective  
386 interpretations and exploratory data analyses. This finding supports a general argument against  
387 the use of cladistic and phylogenetic methods that are restricted to bifurcating relationships in  
388 fossil taxa, where the possibility of variability in evolutionary mode (i.e., occurrence of both

389 anagenesis and cladogenesis) is at odds with an assumption that evolution proceeds by  
390 cladogenesis alone (Fig. 2).

391 Our results differ markedly from previous phylogenetic studies seeking to reconstruct  
392 hominin phylogeny using probabilistic and cladistic methods. In key regions of the tree, results  
393 achieved under our method reveal support for hypotheses more consistent with many qualitative  
394 interpretations of hominin relationships, demonstrating the importance of explicitly  
395 accommodating anagenesis in the phylogenetic reconstruction of fossil taxa. This may explain  
396 some of the historical difficulty in reconciling paleontological interpretations of hominin  
397 relationships with cladistic results. For instance, Dembo and colleagues' results are inconsistent  
398 with earlier suggestions that *Au. anamensis* and *Au. afarensis* are chronospecies differentiated  
399 through anagenesis. However, by considering ancestor-descendant relationships and  
400 incorporating temporal data, our analysis reveals that a linked *Au. anamensis*-*Au. afarensis*  
401 lineage is the arrangement most strongly supported by the data. Generally, this suggests that  
402 cladograms and strictly bifurcating phylogenies may be inadequate when describing evolutionary  
403 relationships between fossil taxa, and so ancestor-descendant relationships should be considered  
404 during topological inference. Further, we argue that explicit testing of ancestor-descendant  
405 relationships is important even in cases where bifurcating trees are not wholly misleading, as  
406 their omission precludes us from considering the full range of possible evolutionary scenarios.  
407 Although previous studies addressing hominin phylogeny using probabilistic methods represent a  
408 significant step forward in weighing alternative evolutionary hypotheses, we suggest that their  
409 phylogenetic reconstructions have suffered from methodological limitations that were not  
410 generally perceived. We suggest that overcoming these limitations can provide a substantial step  
411 forward in closing the gap between the paleobiologists' interpretations and previous cladistic and

412 phylogenetic results. In particular, we show through our analyses that the apparent discordance  
413 between quantitative and qualitative assessments of evolutionary relationships can be reconciled  
414 by extending phylogenetic models to explicitly accommodate anagenesis.

415  
416 *Ancestors, anagenesis, and evolutionary processes.* Our method does not seek to distinguish  
417 between speciation modes at a mechanistic level. As noted by Fisher (2008), overlap between the  
418 extinction and origination times of taxon pairs does not necessarily preclude an ancestor-  
419 descendant relationship. Instead, it is possible for ancestral and descendant lineages to coexist.  
420 This reality may complicate the identification and evolutionary interpretation of ancestor-  
421 descendant relationships from temporal data alone. Doing so requires diversification and  
422 preservation models that contain additional parameters that quantify completeness of the fossil  
423 record. Such models are currently implemented in the *cal3* time-scaling method, which seeks to  
424 distinguish between splitting, budding, and anagenesis from a cladogram with a fixed topology  
425 (Bapst and Hopkins 2016). Our approach is distinct both theoretically and operationally from  
426 *cal3*, instead relying most heavily on morphological evidence to weigh the likelihood of  
427 ancestor-descendant relationships without considering the completeness of fossil sampling. At  
428 the population level, one might expect some temporal overlap between ancestral and descendant  
429 taxa undergoing anagenetic change, especially if the participants are widely distributed  
430 geographically. As a result, even if the temporal ranges corresponding to taxa identified as  
431 ancestor-descendant pairs are discovered to slightly underestimate the time of coexistence, the  
432 inference may simply highlight the fuzziness in the taxonomic placement of fossils belonging to  
433 lineages undergoing continuous transformation and in discerning between anagenesis and  
434 evolutionary budding given incomplete sampling (Fig. 4). This interpretation is consistent with

435 previous authors' treatment of temporal ranges when identifying anagenesis between taxa, which  
436 have allowed a period of overlap between putative ancestor-descendant pairs (Aze et al. 2011;  
437 Strotz and Allen 2013).

438 We use the term 'ancestor' modelled loosely after Gingerich (1979). Ancestors identified  
439 through our method represent collections of samples possessing a suite of morphological  
440 character states that is not sufficiently differentiated from a single or a set of subsequently  
441 occurring samples to warrant assignment to distinct lineages. In our usage, we consider  
442 anagenesis as any evolutionary change occurring along these serially linked phyletic lineage  
443 segments. Thus, the taxonomic and phylogenetic units of analysis are fundamentally important to  
444 the formulation and interpretation of our results. Hominin taxa are often represented by only one  
445 or a small number of samples, and the number of species may be overestimated (White 2003).  
446 This may complicate the ability to meaningfully characterize phylogenetic relationships from a  
447 precise mechanistic view. Nevertheless, morphological and temporal data can be combined to  
448 summarize the relative support for anagenetic and cladogenetic patterns in the inheritance of  
449 observed character states (i.e. even in cases where distinctiveness may not be at the species  
450 level).

451 Under our method, ancestor-descendant relationships might be interpreted either as true  
452 anagenesis (i.e., a single population undergoing gradual transformation), or as some form of  
453 budding cladogenesis. Previous researchers have argued that true anagenesis is rare compared to  
454 budding when analyzing the fossil records of densely-sampled marine invertebrate lineages using  
455 more complex preservation models (Bapst and Hopkins 2016). Nevertheless, we suggest that  
456 distinction between these two modes may often be impossible in terrestrial vertebrate lineages  
457 with large sampling gaps. For example, our results among early hominin species include multiple

458 inferred direct ancestors, but the large gaps in stratigraphic sampling throughout this region of  
459 the tree hamper the ability to determine whether these relationships represent true anagenesis or  
460 budding that has been obfuscated by poor sampling.

461         Instead of relying upon hope that more complex preservation models are robust to wide  
462 sampling gaps, our method disregards the completeness of sampling to evaluate the support for  
463 ancestor-descendant pairs using morphology. Although temporal data occupy an important place  
464 in our approach, they are largely used as a guide to constrain the set of possible ancestors and  
465 descendants and to provide additional insight when morphological data are equivocal. Coarsely  
466 speaking, our approach focuses on patterns in morphological differentiation and lineage  
467 *disparification*, while approaches such as *cal3* model lineage *diversification*. Further empirical  
468 and simulation-based work is needed to determine the relative merits of methods of testing  
469 ancestor-descendant relationships, such as *cal3*, that explicitly focus on diversification patterns,  
470 and ours, which weighs morphological patterns more heavily. We speculate that their relative  
471 accuracy may depend largely on the completeness of sampling in the rock record and the  
472 correlation strength between morphological change and lineage diversification, although other  
473 factors may also be important.

474         The scales at which phylogenetic data are sampled may further complicate mechanistic  
475 evolutionary interpretations. Morphological character matrices often lack samples across the  
476 entire stratigraphic range of each taxon, and so generally assume morphological stasis within  
477 lineages. It is therefore often impossible to observe gradual morphological change within and  
478 between taxa. These considerations might cause anagenetic relationships identified here to  
479 represent either true anagenesis or some form of ‘pseudo-anagenesis’, where stratigraphic and  
480 morphological data appear consistent with anagenesis but the persistence of the ancestor has not

481 been sampled. The ancestor-descendant relationships identified by our method may be  
482 interpreted in several ways. As sampled, these results may be roughly conceived as anagenesis in  
483 the sense that the mode of evolutionary change between taxa is indistinguishable from evolution  
484 occurring along a single lineage, depending upon the completeness of sampling and the degree to  
485 which morphological disparity correlates with true biological species diversity. This  
486 interpretation is consistent with historical usage by paleobiologists (Gingerich 1979; Smith 1994;  
487 Levinton 2001). Thus, our approach seeks to reveal the extent to which existing cladistic and  
488 temporal data can provide evidence for non-branching evolutionary modes and does not seek to  
489 resolve conceptual issues that may stem from incomplete sampling, lineage diversification, or  
490 population-level evolutionary change. Regardless of the fine-scale evolutionary interpretation,  
491 failure to accommodate phyletic change and ancestor-descendant relationships when inferring  
492 phylogenetic relationships can generate views of evolutionary history that are positively  
493 misleading in the sense that incorrect results cannot improve with the addition of new data.

494 *Some practical methodological considerations.* Concerns regarding the accuracy of probabilistic  
495 approaches have been raised, stemming from the reliance of these methods on the overly  
496 simplistic Lewis Mk model of morphological evolution (Goloboff et al. 2017). These critics  
497 advocate the use of cladistic methods, arguing that Markov models inadequately capture the  
498 complexities of morphological evolution. Although we agree that existing substitution models  
499 oversimplify these processes, our results suggest that the accommodation of ancestor-descendant  
500 hypotheses in probabilistic methods can improve the fidelity of phylogenetic reconstructions,  
501 even when Lewis Mk is used as the underlying model of morphological change. As a result,  
502 concerns regarding the adequacy of existing morphological substitution models may be partially  
503 alleviated by considering hypotheses of direct ancestorship. This is supported by simulation

504 work showing that stratocladistics outperforms cladistics in topology reconstruction (Fox et al.  
505 1999). Further exploration is needed to demonstrate more thoroughly the limitations of our new  
506 approach, which builds upon stratocladistics by incorporating the benefits of probabilistic  
507 analyses, including 1) more explicit statements of the assumptions involved, and 2) the ability to  
508 weigh competing models using modern inferential criteria.

509         The method we describe seeks to enhance understanding of the fossil record by explicitly  
510 testing support for existing hypotheses of direct ancestorship while attempting to make more  
511 explicit assumptions than stratocladistics or recently developed Bayesian methods. Although it  
512 shares features with recent methods that use mechanistic evolutionary models in a Bayesian  
513 context to infer ancestral relationships (Zhang et al. 2016), our approach is intended as a  
514 foundational, minimally complex framework for exploring the behavior of probabilistic models  
515 to evaluate support for anagenesis in temporal and morphological data. As such, our method  
516 should be viewed as a complement to, rather than a simplification of, existing Bayesian  
517 approaches. That is, our method encourages examination of the informativeness of the data  
518 without the increased complexity of assessing prior probabilities. Our method further differs  
519 from both existing Bayesian and parametric APT approaches by explicitly omitting  
520 diversification parameters and instead placing morphological data in a central role when  
521 evaluating hypotheses of direct ancestry. In doing so, temporal data help to delineate the set of  
522 possible ancestors and play an important role in measuring the fit of candidate trees to the  
523 observed stratigraphic record. Our method does not seek to reconstruct diversification processes,  
524 and instead focuses on identifying hypotheses that best describe only the information contained  
525 within morphological and temporal datasets. Assessment of information contained within  
526 datasets and tests of hypotheses can also be achieved using Bayesian approaches (Lewis et al.

527 2016), but likelihoodist approaches such as ours streamline these procedures by reducing  
528 complications presented by prior probabilities and Bayesian Markov-chain Monte Carlo  
529 sampling.

530         Although Bayesian methods can be beneficial in certain circumstances, our method  
531 simplifies identification of anagenetic hypotheses using evolutionary and stratigraphic models.  
532 We observe that the likelihood surface surrounding certain nodes may possess low peaks (Table  
533 1), which likely results from sparse sampling and relatively low information in the  
534 morphological characters. Since Bayesian approaches often average results across this surface, it  
535 is possible that they may fail to capture those relationships best supported by the data by  
536 including information from weakly supported hypotheses. This is of greater concern in  
537 paleontological than neontological data because the increased abundance of molecular data is  
538 often likely to result in more clearly defined peaks in the likelihood surface. In cases where  
539 information is sparse, likelihoodist approaches such as ours offer the benefit of filtering through  
540 noisy and equivocal signal to reveal the hypothesis best supported by the data. Although these  
541 benefits are also achievable through Bayesian approaches, additional caution must be taken to  
542 select priors that do not dominate weakly informative data. In addition, careful thought should be  
543 given when summarizing the posterior/likelihood surface. Averaging across a relatively flat  
544 surface might yield poor results (Yang and Zhu 2018), while the comparison of individual point  
545 estimates, as is done here, may more clearly shed light on models best supported by the data  
546 while clearly capturing their relative support.

547 *How can we proceed?* Anagenesis and splitting cladogenesis were most pertinent to our analysis  
548 of hominin evolution, and the straightforward dichotomy between these simplified the  
549 assumptions and interpretation of our tests. Our approach may need to explicitly accommodate



550 budding before being applied to groups with very dense fossil records. However, the assumptions  
551 required, which may often include morphological stasis within lineages, may make application to  
552 some phylogenetic datasets impractical. This is especially true in cases such as hominins, for  
553 which the fossil record implies large sampling gaps, and characters representative across  
554 stratigraphic ranges are often sampled from only a single individual. Expansions of our approach  
555 through implementation of new models will further test the implications of existing  
556 paleontological datasets for reconstructing complex evolutionary and geologic processes over  
557 deep timescales. We hope that the example provided here will encourage integration of more  
558 diverse evolutionary modes into phylogenetic methods yielding better explanations of temporal  
559 patterns in critical parts of life's history.

560         As we emphasize above, the approach described here should be viewed as an attempt to  
561 explore the capability of phylogenetic methods to identify the signal of anagenesis using existing  
562 models to interrogate morphological and stratigraphic data. In doing so, we acknowledge that  
563 there are many complicated biological and geological factors that could be incorporated into this  
564 framework. For instance, previous researchers have accommodated heterogeneity in fossil  
565 preservation rates across time and among lineages (Foote 1997; 2001; Gavryushkina et al. 2014).  
566 There have also been several concerns raised in the literature regarding the adequacy of existing  
567 models of discrete trait evolution to inform complex evolutionary scenarios (Goloboff et al.  
568 2017; Brown et al. 2017). Alternative models that use continuous characters may help to improve  
569 some of these issues (Felsenstein 1988; Goloboff et al. 2006; Parins-Fukuchi 2017). Moving  
570 forward, elaborations making use of new data sources and models will only continue to improve  
571 resolution of evolutionary patterns in the fossil record.

572           Finally, we acknowledge that our empirical results beg qualification. In particular, we  
573 expect that future studies will generate a more comprehensive and authoritative view of hominin  
574 evolution as improved data continue to become available. For instance, although we are currently  
575 cautious about making strong statements concerning the ancestral position of *Sahelanthropus*  
576 using this dataset, additional information may resolve this issue. This may be the case for several  
577 other areas of the hominin tree, which may be better resolved as temporal and taxonomic gaps in  
578 sampling are better filled by new discoveries. In addition, we concede the possibility that more  
579 comprehensive automated tree searching routines may reveal support for hypotheses that we  
580 failed to consider under our semi-automated approach. Therefore, instead of providing an  
581 authoritative view of hominin evolution, our study provides a springboard for future studies by  
582 showing that the accommodation of anagenesis can improve our view of the processes and  
583 relationships underpinning the evolution of fossil taxa. Nevertheless, due to the improved  
584 support and congruence of hypotheses that explicitly consider ancestor-descendant relationships,  
585 we recommend that future phylogenetic studies in hominins avoid methods that only consider  
586 bifurcating relationships. Future studies that build upon existing work in other taxa will also be  
587 important to better characterize the extent to which this suggestion can be generalized across the  
588 tree of life. Although the accommodation of directly ancestral relationships is especially relevant  
589 in hominin taxa, for which hypotheses of anagenesis have been long entertained through  
590 qualitative anatomical assessment, these results may also be important in other taxa. Further  
591 empirical work will be needed to develop a better understanding of the extent to which the  
592 consideration of direct ancestors can improve resolution of evolutionary patterns throughout the  
593 fossil record.

594

## 595 **References**

- 596 Asfaw, B., T. White, O. Lovejoy, B. Latimer, S. Simpson, and G. Suwa. 1999. *Australopithecus*  
597 *garhi*: a new species of early hominid from Ethiopia. *Science* 284:629–635. American  
598 Association for the Advancement of Science.
- 599 Aze, T., T. H. G. Ezard, A. Purvis, H. K. Coxall, D. R. M. Stewart, B. S. Wade, and P. N.  
600 Pearson. 2011. A phylogeny of Cenozoic macroperforate planktonic foraminifera from fossil  
601 data. *Biol. Rev.* 86:900–927.
- 602 Aze, T., T. H. G. Ezard, A. Purvis, H. K. Coxall, D. R. M. Stewart, B. S. Wade, and P. N.  
603 Pearson. 2013. Identifying anagenesis and cladogenesis in the fossil record. *Proc. Natl. Acad.*  
604 *Sci. U.S.A.* 110:E2946–E2946.
- 605 Bapst, D. W. 2013. A stochastic rate-calibrated method for time-scaling phylogenies of fossil  
606 taxa. *Methods in Ecology and Evolution* 4:724–733.
- 607 Bapst, D. W., and M. J. Hopkins. 2016. Comparing cal3 and other a posteriori time-scaling  
608 approaches in a case study with the pterocephaliid trilobites. *Paleobiology* 43:49–67. Cambridge  
609 University Press.
- 610 Bermúdez de Castro, J. M., J. L. Arsuaga, E. Carbonell, A. Rosas, I. Martínez, and M. Mosquera.  
611 1997. A hominid from the lower Pleistocene of Atapuerca, Spain: possible ancestor to  
612 Neandertals and modern humans. *Science* 276:1392–1395.
- 613 Brown, J. W., C. Parins-Fukuchi, G. W. Stull, O. M. Vargas, and S. A. Smith. 2017. Bayesian  
614 and likelihood phylogenetic reconstructions of morphological traits are not discordant when  
615 taking uncertainty into consideration: a comment on Puttick et al. *Proc. Roy. Soc. B*  
616 284:20170986. The Royal Society.
- 617 Brunet, M., F. Guy, D. Pilbeam, H. T. Mackaye, A. Likius, D. Ahounta, A. Beauvilain, C.  
618 Blondel, H. Bocherens, J.-R. Boisserie, L. De Bonis, Y. Coppens, J. Dejax, C. Denys, P.  
619 Düringer, V. Eisenmann, G. Fanone, P. Fronty, D. Geraads, T. Lehmann, F. Lihoreau, A.  
620 Louchart, A. Mahamat, G. Merceron, G. Mouchelin, O. Otero, P. P. Campomanes, M. P. De  
621 Leon, J.-C. Rage, M. Sapanet, M. Schuster, J. Sudre, P. Tassy, X. Valentin, P. Vignaud, L.  
622 Viriot, A. Zazzo, and C. Zollikofer. 2002. A new hominid from the Upper Miocene of Chad,  
623 Central Africa. *Nature* 418:145–151. Nature Publishing Group.
- 624 Buck, L. T., and C. B. Stringer. 2014. *Homo heidelbergensis*. *Current Biology* 24:R214–R215.
- 625 Chamberlain, A., and B. Wood. 1987. Early hominid phylogeny. *J. Hum. Evol.* 16:119–133.
- 626 Collard, M., and B. Wood. 2000. How reliable are human phylogenetic hypotheses? *Proc. Natl.*  
627 *Acad. Sci. U.S.A.* 97:5003–5006. National Acad Sciences.
- 628 Darwin, C. 1871. *The Descent of Man, and Selection in Relation to Sex*. 1st ed. John Murray,  
629 London, UK.

- 630 Delson, E., N. Eldredge, and I. Tattersall. 1977. Reconstruction of hominid phylogeny: A  
631 testable framework based on cladistic analysis. *J. Hum. Evol.* 6:263–278.
- 632 Dembo, M., D. Radovčić, H. M. Garvin, M. F. Laird, L. Schroeder, J. E. Scott, J. Brophy, R. R.  
633 Ackermann, C. M. Musiba, D. J. de Ruiter, A. Ø. Mooers, and M. Collard. 2016. The  
634 evolutionary relationships and age of *Homo naledi*: An assessment using dated Bayesian  
635 phylogenetic methods. *J. Hum. Evol.* 97:17–26.
- 636 Dembo, M., N. J. Matzke, A. Ø. Mooers, and M. Collard. 2015. Bayesian analysis of a  
637 morphological supermatrix sheds light on controversial fossil hominin relationships. *Proc. Roy.  
638 Soc. B* 282:20150943.
- 639 Felsenstein, J. 1981. Evolutionary trees from DNA sequences: a maximum likelihood approach.  
640 *J. Mol. Evol.* 17:368–376.
- 641 Felsenstein, J. 1988. Phylogenies and Quantitative Characters. *Annual Review of Ecology and  
642 Systematics* 19:445–471.
- 643 Fisher, D. C. 2008. Stratocladistics: Integrating Temporal Data and Character Data in  
644 Phylogenetic Inference. *Annual Review of Ecology, Evolution, and Systematics* 39:365–385.
- 645 Foote, M. 1997. Estimating taxonomic durations and preservation probability. *Paleobiology*  
646 23:278–300.
- 647 Foote, M. 2001. Inferring temporal patterns of preservation, origination, and extinction from  
648 taxonomic survivorship analysis. *Paleobiology* 27:602–630.
- 649 Foote, M. 1996. On the probability of ancestors in the fossil record. *Paleobiology* 22:141–151.
- 650 Fox, D. L., D. C. Fisher, and L. R. Leighton. 1999. Reconstructing Phylogeny with and without  
651 Temporal Data. *Science* 284:1816–1819. American Association for the Advancement of Science.
- 652 Futuyma, D. J. 1987. On the Role of Species in Anagenesis. *Am. Nat.* 130:465–473.
- 653 Gavryushkina, A., D. Welch, T. Stadler, and A. J. Drummond. 2014. Bayesian inference of  
654 sampled ancestor trees for epidemiology and fossil calibration. 10:e1003919.
- 655 Gavryushkina, A., T. A. Heath, D. T. Ksepka, T. Stadler, D. Welch, and A. J. Drummond. 2017.  
656 Bayesian Total-Evidence Dating Reveals the Recent Crown Radiation of Penguins. *Syst. Biol.*  
657 66:57–73.
- 658 Gingerich, P. D. 1985. Species in the fossil record: concepts, trends, and transitions.  
659 *Paleobiology* 11:27–41.
- 660 Gingerich, P. D. 1979. Stratophenetic approach to phylogeny reconstruction. *in* J. Cracraft and  
661 N. Eldredge, eds. *Phylogenetic Analysis and Paleontology*. Columbia University Press, New  
662 York, NY.

- 663 Goloboff, P. A., A. Torres, and J. S. Arias. 2017. Weighted parsimony outperforms other  
664 methods of phylogenetic inference under models appropriate for morphology. *Cladistics*  
665 281:20141278.
- 666 Goloboff, P. A., C. I. Mattoni, and A. S. Quinteros. 2006. Continuous characters analyzed as  
667 such. *Cladistics* 22:589–601. Blackwell Publishing Ltd.
- 668 Gould, S. J. 1980. Is a new and general theory of evolution emerging? *Paleobiology* 6:119–130.
- 669 Gould, S. J., and N. Eldredge. 1977. Punctuated equilibria: the tempo and mode of evolution  
670 reconsidered. *Paleobiology* 3:115–151.
- 671 Guy, F., D. E. Lieberman, D. Pilbeam, M. P. de Leon, A. Likius, H. T. Mackaye, P. Vignaud, C.  
672 Zollikofer, and M. Brunet. 2005. Morphological affinities of the Sahelanthropus tchadensis (Late  
673 Miocene hominid from Chad) cranium. *Proceedings of the National Academy of Sciences*  
674 102:18836–18841.
- 675 Heath, T. A., J. P. Huelsenbeck, and T. Stadler. 2014. The fossilized birth-death process for  
676 coherent calibration of divergence-time estimates. *Proc. Natl. Acad. Sci. U.S.A.* 111:E2957–66.
- 677 Huelsenbeck, J. P., and B. Rannala. 1997. Maximum Likelihood Estimation of Phylogeny Using  
678 Stratigraphic Data. *Paleobiology* 23:174–180. Paleontological Society.
- 679 Irish, J. D., D. Guatelli-Steinberg, S. S. Legge, D. J. de Ruiter, and L. R. Berger. 2013. Dental  
680 morphology and the phylogenetic “place” of Australopithecus sediba. *Science* 340:1233062–  
681 1233062.
- 682 Jones, E., T. Oliphant, and P. Peterson. n.d. SciPy: Open Source Scientific Tools for Python.
- 683 Kimbel, W. H., C. A. Lockwood, C. V. Ward, M. G. Leakey, Y. Rak, and D. C. Johanson. 2006.  
684 Was Australopithecus anamensis ancestral to A. afarensis? A case of anagenesis in the hominin  
685 fossil record. *J. Hum. Evol.* 51:134–152.
- 686 Leakey, M. G., C. S. Feibel, I. McDougall, and A. Walker. 1995. New four-million-year-old  
687 hominid species from Kanapoi and Allia Bay, Kenya. *Nature* 376:565–571. Nature Publishing  
688 Group.
- 689 Levinton, J. S. 2001. *Genetics, Paleontology, and Macroevolution*. Cambridge University Press.
- 690 Levinton, J. S., and M. S. Chris. 1980. A Critique of the Punctuated Equilibria Model and  
691 Implications for the Detection of Speciation in the Fossil Record. *Syst. Biol.* 29:130–142.
- 692 Lewis, P. O. 2001. A Likelihood Approach to Estimating Phylogeny from Discrete  
693 Morphological Character Data. *Syst. Biol.* 50:913–925.
- 694 Lewis, P. O., M.-H. Chen, L. Kuo, L. A. Lewis, K. Fučíková, S. Neupane, Y.-B. Wang, and D.  
695 Shi. 2016. Estimating Bayesian Phylogenetic Information Content. *Syst. Biol.* 65:1009–1023.

- 696 MacLatchy, L. M., J. Desilva, W. J. Sanders, and B. Wood. 2010. Hominini. *in* W. J. Sanders  
697 and L. Werdelin, eds. *Cenozoic mammals of Africa*. University of California Press, Oakland, CA.
- 698 MacLeod, N. 1991. Punctuated anagenesis and the importance of stratigraphy to paleobiology.  
699 *Paleobiology* 17:167–188.
- 700 Mounier, A., F. Marchal, and S. Condemi. 2009. Is *Homo heidelbergensis* a distinct species?  
701 New insight on the Mauer mandible. *J. Hum. Evol.*
- 702 Parins-Fukuchi, C. 2017. Use of Continuous Traits Can Improve Morphological Phylogenetics.  
703 *Syst. Biol.*, doi: 10.1093/sysbio/syx072.
- 704 Puttick, M. N., J. E. O'Reilly, A. R. Tanner, J. F. Fleming, J. Clark, L. Holloway, J. Lozano-  
705 Fernandez, L. A. Parry, J. E. Tarver, D. Pisani, and P. C. J. Donoghue. 2017. Uncertain-tree:  
706 discriminating among competing approaches to the phylogenetic analysis of phenotype data.  
707 *Proc. Roy. Soc. B* 284:20162290.
- 708 Pyron, R. A. 2011. Divergence Time Estimation Using Fossils as Terminal Taxa and the Origins  
709 of Lissamphibia. 60:466–481. Oxford University Press.
- 710 Rightmire, G. P. 1998. Human evolution in the Middle Pleistocene: the role of *Homo*  
711 *heidelbergensis*. *Evolutionary Anthropology*.
- 712 Rosas, A., and J. M. Bermúdez De Castro. 1998. The Mauer mandible and the evolutionary  
713 significance of *Homo heidelbergensis*. *Geobios* 31:687–697.
- 714 Simpson, G. G. 1944. *Tempo and Mode in Evolution*. Columbia University Press, New York.
- 715 Smith, A. B. 2000. Stratigraphy in phylogeny reconstruction. *Journal of Paleontology* 74:763–  
716 766.
- 717 Smith, A. B. 1994. *Systematics and the Fossil Record*. Blackwell Science Ltd, Oxford, UK.
- 718 Stadler, T. 2010. Sampling-through-time in birth–death trees. *Journal of Theoretical Biology*  
719 267:396–404.
- 720 Stadler, T., A. Gavryushkina, R. C. M. Warnock, A. J. Drummond, and T. A. Heath. 2017. The  
721 fossilized birth-death model for the analysis of stratigraphic range data under different speciation  
722 concepts.
- 723 Stanley, S. M. 1998. *Macroevolution: Pattern and Process*. 2nd ed. Johns Hopkins University  
724 Press, Baltimore, MD.
- 725 Strait, D. S. 1999. Cladistics and Early Hominid Phylogeny. *Science* 285:1209c–1209.
- 726 Strait, D. S., F. E. Grine, and M. A. Moniz. 1997. A reappraisal of early hominid phylogeny. *J.*  
727 *Hum. Evol.* 32:17–82.

- 728 Stringer, C. 2012. The status of *Homo heidelbergensis* (Schoetensack 1908). *Evolutionary*  
729 *Anthropology: Issues, News, and Reviews* 21:101–107. Wiley-Blackwell.
- 730 Strotz, L. C., and A. P. Allen. 2013. Assessing the role of cladogenesis in macroevolution by  
731 integrating fossil and molecular evidence. *Proc. Natl. Acad. Sci. U.S.A.* 110:2904–2909.
- 732 Wagner, P. J. 1998. A likelihood approach for evaluating estimates of phylogenetic relationships  
733 among fossil taxa. *Paleobiology* 24:430–449. Cambridge University Press.
- 734 Ward, C. V., M. G. Leakey, and A. Walker. 2001. Morphology of *Australopithecus anamensis*  
735 from Kanapoi and Allia Bay, Kenya. *J. Hum. Evol.* 41:255–368.
- 736 White, T. 2003. Paleoanthropology. Early hominids--diversity or distortion? *Science* 299:1994–  
737 1997.
- 738 Wright, A. M., and D. M. Hillis. 2014. Bayesian analysis using a simple likelihood model  
739 outperforms parsimony for estimation of phylogeny from discrete morphological data.  
740 9:e109210. Public Library of Science.
- 741 Yang, Z., and T. Zhu. 2018. Bayesian selection of misspecified models is overconfident and may  
742 cause spurious posterior probabilities for phylogenetic trees. *Proc. Natl. Acad. Sci. U.S.A.*  
743 115:1854–1859. National Academy of Sciences.
- 744 Yang, Z., S. Kumar, and M. Nei. 1995. A new method of inference of ancestral nucleotide and  
745 amino acid sequences. *Genetics* 141:1641–1650.
- 746 Zhang, C., T. Stadler, S. Klopstein, T. A. Heath, and F. Ronquist. 2016. Total-Evidence Dating  
747 under the Fossilized Birth-Death Process. *Syst. Biol.* 65:228–249.
- 748 Zollikofer, C. P. E., M. S. Ponce de León, D. E. Lieberman, F. Guy, D. Pilbeam, A. Likius, H. T.  
749 Mackaye, P. Vignaud, and M. Brunet. 2005. Virtual cranial reconstruction of *Sahelanthropus*  
750 *tchadensis*. *Nature* 434:755–759. Nature Publishing Group.

751

752

753

754

755

756

757

758 **Tables:**

| Hypothesis                                                       | AIC score |
|------------------------------------------------------------------|-----------|
| <i>Au. garhi</i> outgroup to <i>Paranthropus</i> and <i>Homo</i> | 9271.11   |
| <i>Au. garhi</i> directly ancestral to <i>Homo</i>               | 9264.30   |

759 **Table 1.** Support for alternative hypotheses regarding the placement of *Au. garhi*.

760

761 **Figures:**

762

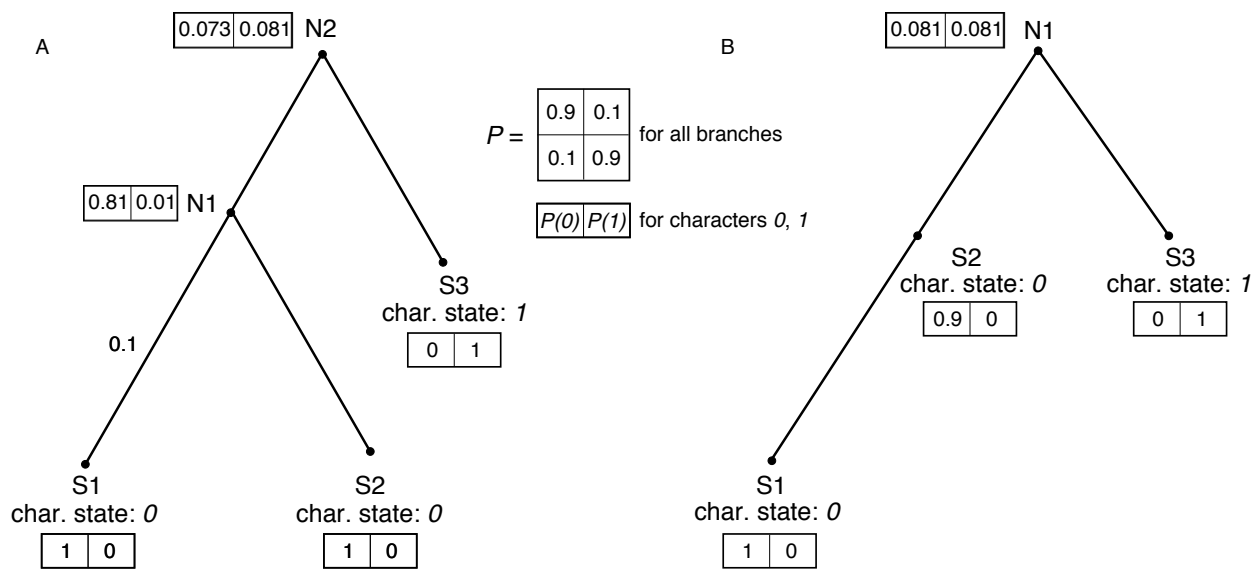

763

764 **Fig. 1.** Comparison between anagenetic and cladogenetic trees. A) Likelihoods are calculated on

765 bifurcating arrangements using the standard ‘pruning algorithm’. B) Anagenetic likelihoods are

766 calculated using a novel approach, where ancestral states may be known.



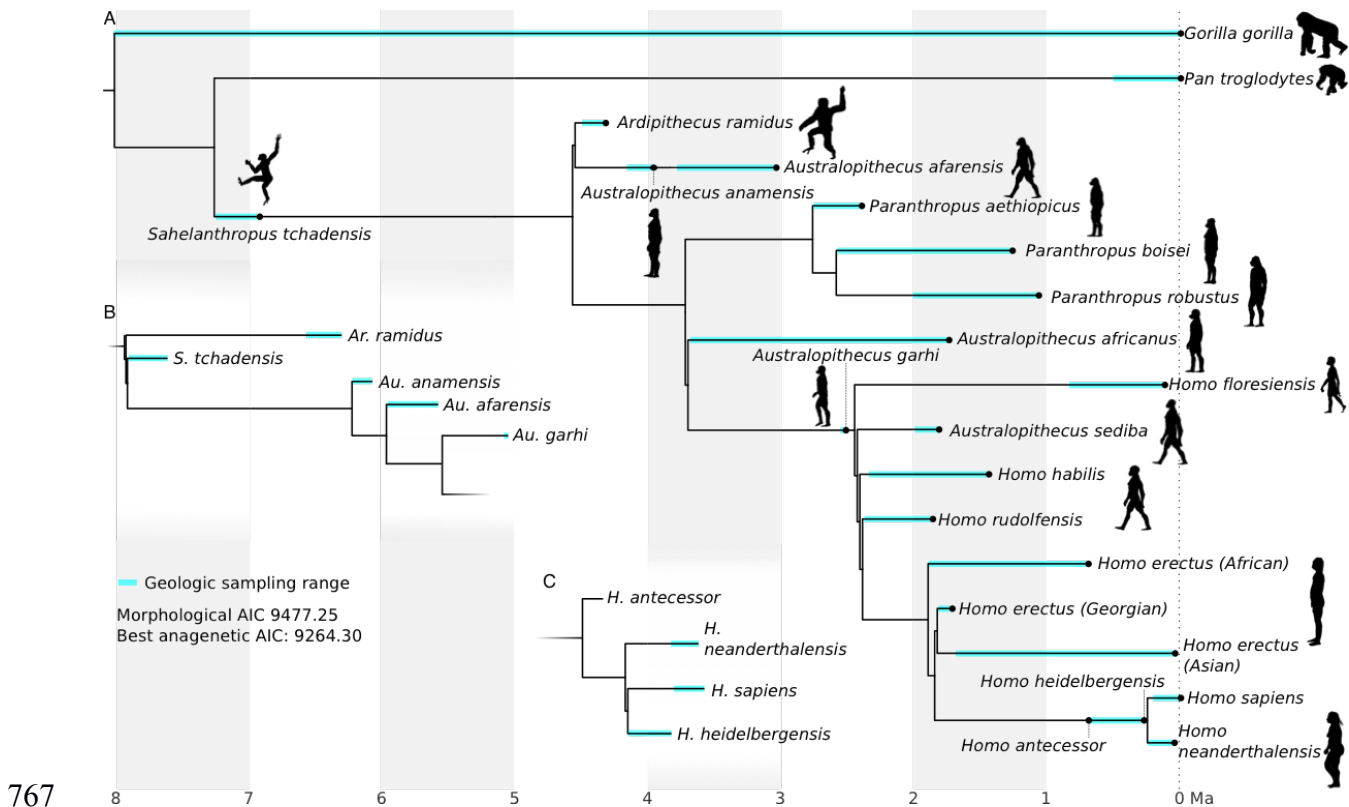

767

768 **Fig. 2.** Phylogenetic relationships between hominin species. A) Reconstruction with the best AIC

769 score when temporal data are considered alongside morphological data and anagenesis is

770 accommodated. B, C) Areas of the tree inferred from morphology alone that differ from

771 panel A. Both regions display misleading results when anagenesis is not considered. This

772 is reflected in the improvement in AIC observed in the preferred anagenetic topology.

773 Silhouettes obtained from phylopic.org.

774

775

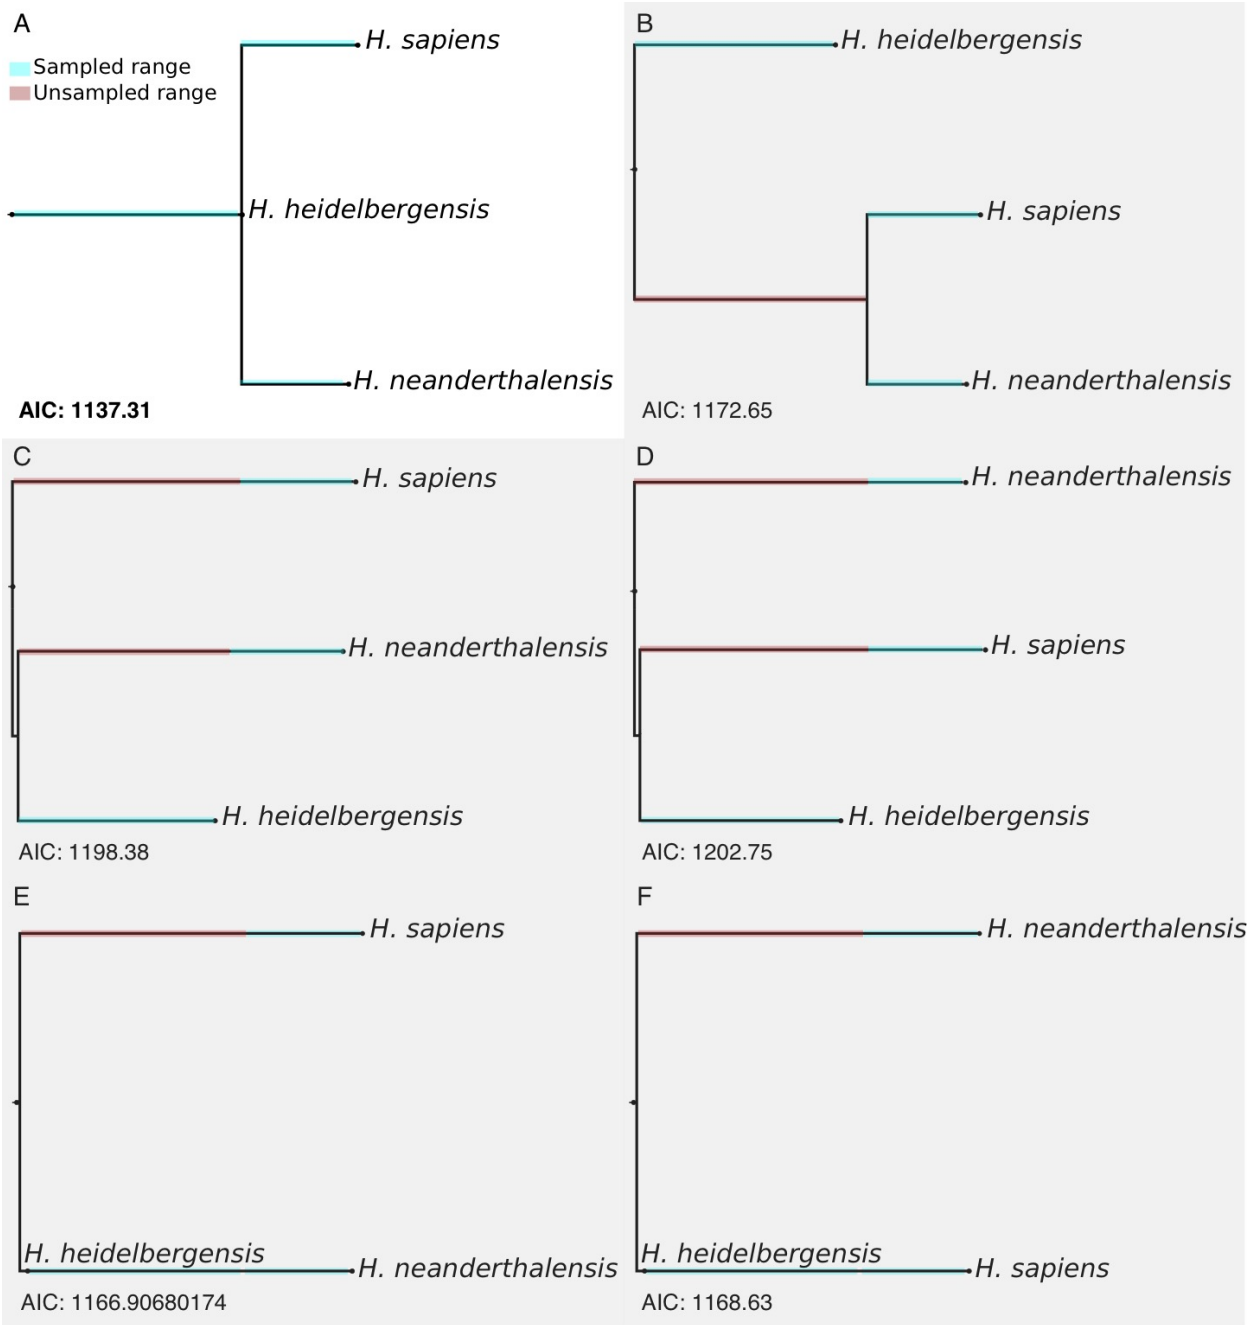

776

777

**Fig. 3.** AIC scores calculated for each possible arrangement between *H. sapiens*, *H.*

778

*neanderthalensis*, and *H. heidelbergensis*.

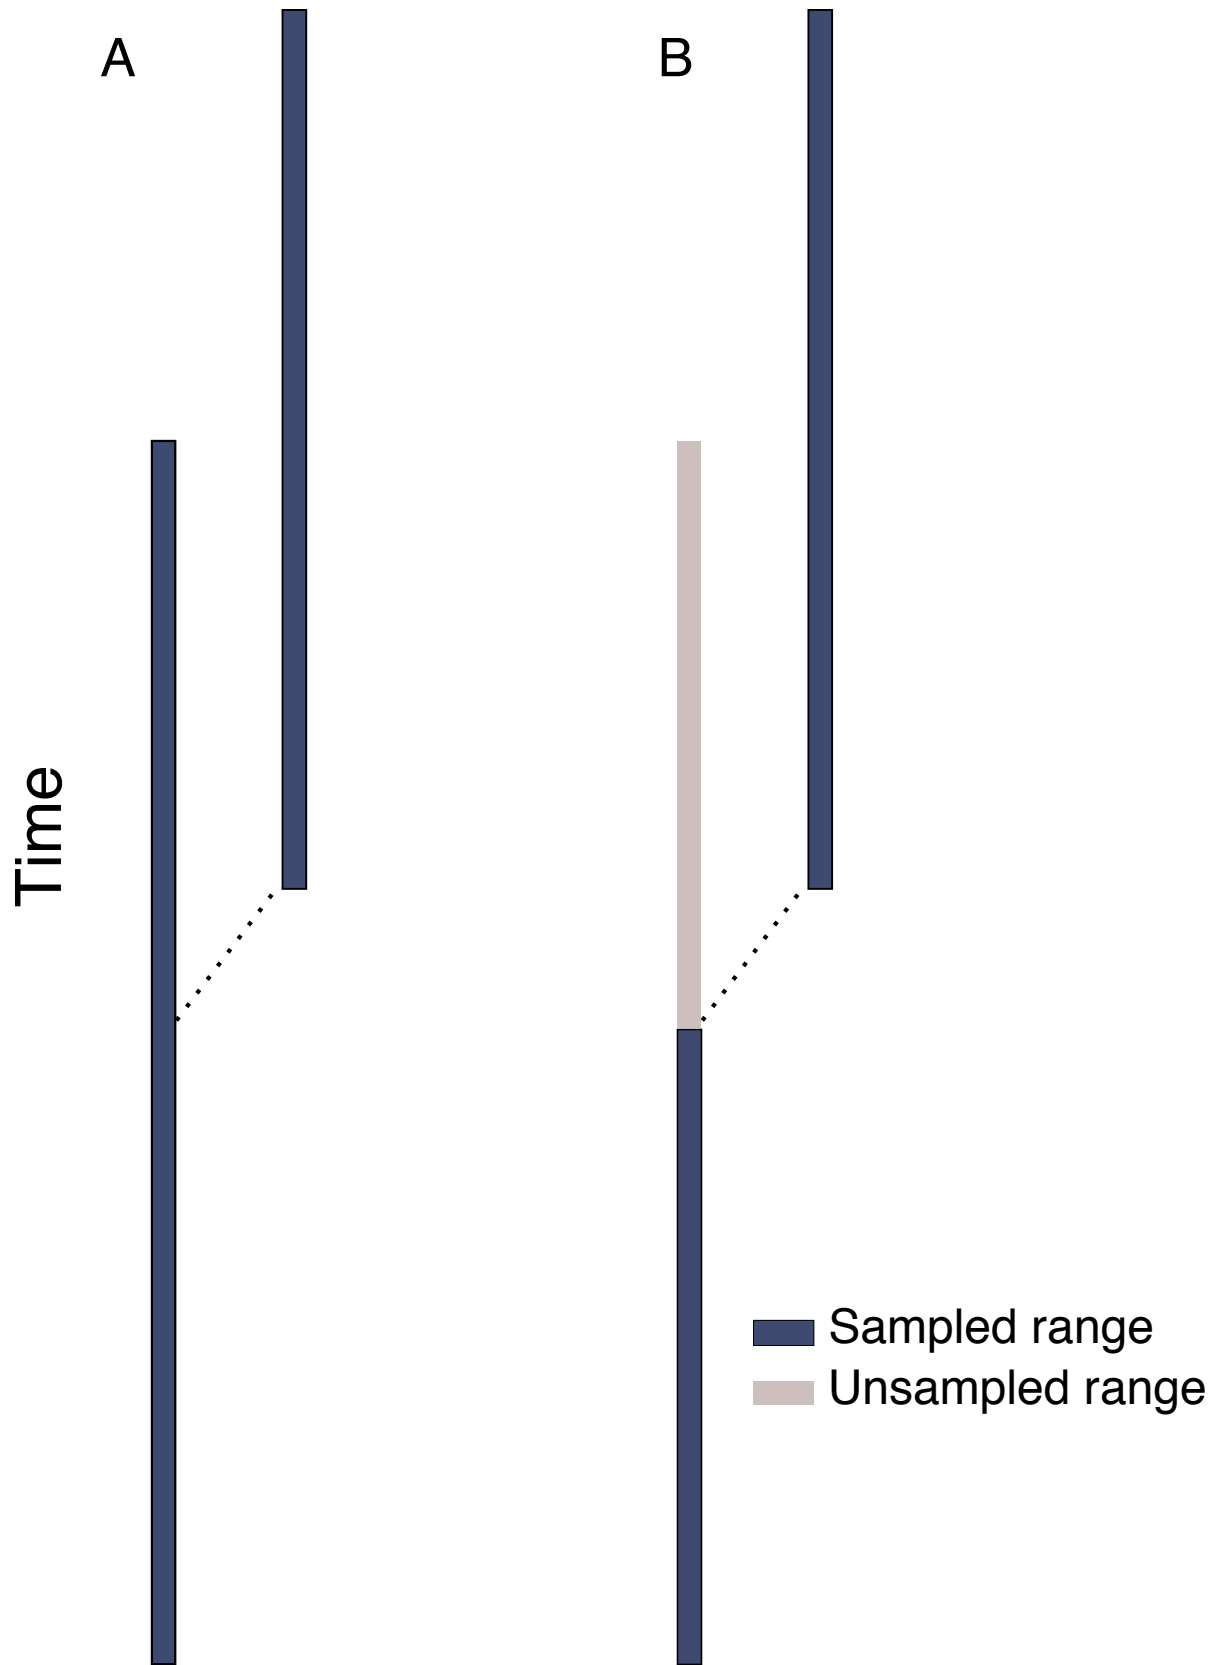

779  
780

**Figure 4.** A) Speciation mode interpreted as budding when sampling is complete. B) Incomplete

781 stratigraphic sampling may create an inability to distinguish between anagenesis and  
782 budding when sampling is sparse.
